# Supplementary material
Source: ML conference proceedings conference paper supplement (https://openaccess.thecvf.com/content/WACV2024/html/Zhang_Can_Vision-Language_Models_WACV_2024_paper.html)
Supplement: Supplementary file 1 [file Zhang_Can_Vision-Language_Models_WACV_2024_supplemental.pdf]

# Can Vision-Language Models be a Good Guesser? Exploring VLMs for Times and Location Reasoning

## Supplementary Materials

Gengyuan Zhang<sup>1,2</sup> Yurui Zhang<sup>3</sup> Kerui Zhang<sup>1</sup> Volker Tresp<sup>1,2</sup>

<sup>1</sup> LMU Munich, Munich, Germany

<sup>2</sup> Munich Center for Machine Learning, Munich, Germany

<sup>3</sup> Technical University of Munich

zhang@dbs.ifi.lmu.de

### A. Dataset WikiTiLo

#### A.1. List of countries in WikiTiLo

The countries included in WikiTiLo and their regions are listed in Tab. 1. These countries are almost evenly distributed in 7 regions defined by their cultural and geographical affinity with reference of UNESCO<sup>1</sup> and sorted alphabetically.

| Country      | Region             | Country       | Region             |
|--------------|--------------------|---------------|--------------------|
| Afghanistan  | Middle East        | Argentina     | Latin America      |
| Australia    | NA, EU and OC      | Brazil        | Latin America      |
| Bangladesh   | Southern Asia      | China         | Eastern Asia       |
| Germany      | NA, EU and OC      | India         | Southern Asia      |
| Indonesia    | South-Eastern Asia | Iran          | Middle East        |
| Japan        | Eastern Asia       | Kazakhstan    | Central Asia       |
| Kenya        | Sub-Saharan Africa | Kyrgyzstan    | Central Asia       |
| Malaysia     | South-Eastern Asia | Mexico        | Latin America      |
| Nigeria      | Sub-Saharan Africa | North Korea   | Eastern Asia       |
| Pakistan     | Middle East        | Rwanda        | Sub-Saharan Africa |
| Saudi Arabia | Middle East        | South Africa  | Sub-Saharan Africa |
| South Korea  | Eastern Asia       | Sri Lanka     | Southern Asia      |
| Tajikistan   | Central Asia       | Thailand      | South-Eastern Asia |
| Turkmenistan | Central Asia       | United States | NA, EU and OC      |
| Uzbekistan   | Central Aisa       | Vietnam       | South-Eastern Asia |

Table 1. Countries with corresponding regions (NA, EU, and OC is the abbreviation of North America, Europa, and Oceania).

#### A.2. Data curation

In order to guarantee that WikiTiLo comprises images that are characteristics of socio-cultural visual hints, we conduct a manual image curation based on image visual cues on raw images in Wikimedia Commons, as in Fig. 1. We try to ensure that the space identity and time period of each image can be distinguished from the architectural patterns, costume styles, language types, movement postures, photo colors, and quality, or other fine-grained features.

<sup>1</sup><https://population.un.org/wpp/DefinitionOfRegions/>

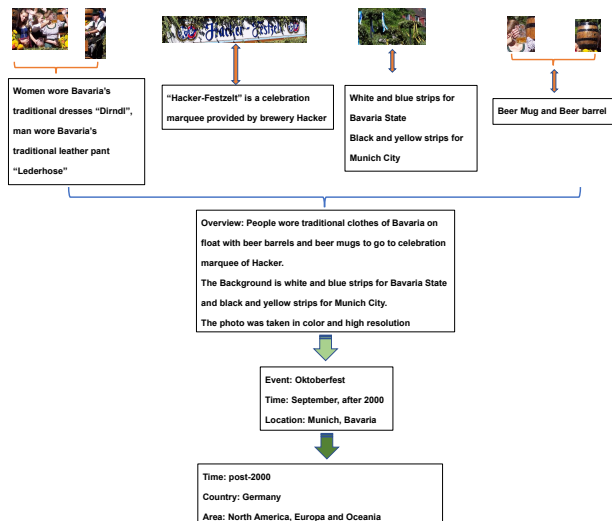

Figure 1. An example of manual image curating to determine its time and location. By doing this, the images of WikiTiLo are grounded by multiple scene text, faces, object segments from the image, and colors and resolution of the image.

#### A.3. Data distribution

The dataset distribution in location and times can be found in Fig. 2.

### B. Visual encoders of discriminative VLMs

We compare all the visual encoders of discriminative Vision Language Models and Vision Models we used for references in the paper in the dimension of the dataset, visual encoder, and textual encoder in Tab. 2.

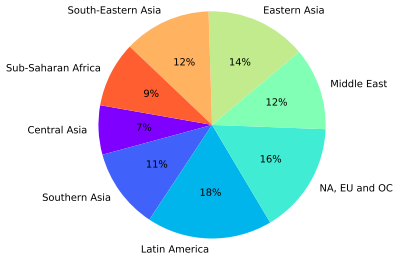

a Location Distribution

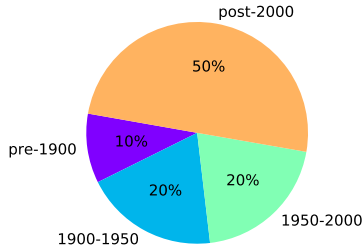

b Times Distribution

Figure 2. The WikiTiLo dataset exhibits a diverse distribution of times and locations. In terms of time, the images range from 1827 to the post-2000 era. Regarding location, we selected 30 countries whose images met our filtering criteria, representing eight regions. Due to the development of Internet media, images taken after 2000 constitute a significant portion of the dataset. Conversely, images taken before 1900 only account for 10% of the dataset, primarily due to limited data availability and poor quality.

| Model     | Visual Encoder | Text Encoder | Dataset                        | Multimodal |
|-----------|----------------|--------------|--------------------------------|------------|
| ResNet-50 | ResNet         | -            | ImageNet [4]                   | ✗          |
| ViLT      | Patch Emb.     | BERT         | MSCOCO [3], GCC [5]            | ✓          |
| CLIP-ViT  | ViT            | Transf.      | Online data                    | ✓          |
| CLIP-RN   | ResNet         | Transf.      | Online data                    | ✓          |
| BLIP      | ViT            | BERT         | CapFilt [2], 14M [2], 129M [2] | ✓          |

Table 2. Comparison of disminutive VLMs. Variants of different datasets and encoders will be denoted by suffixes.

## C. Impact of shot numbers

We studied the impact of shot number for OpenFlamingo as in Fig. 3. Especially for REASONING<sub>TIMES</sub>, we find the output prediction is more unstable when having more in-context shots and deteriorates the performance.

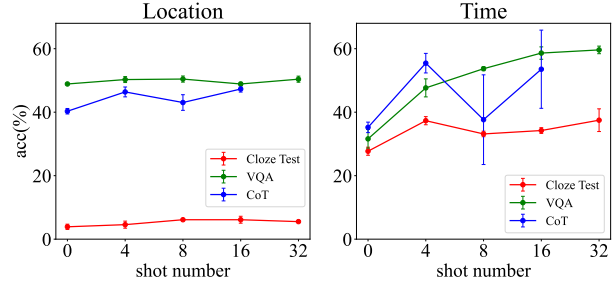

Figure 3. Impact of different shot numbers for OpenFlamingo. More in-context shots do not substantially increase the performance on REASONING<sub>LOCATION</sub>, but achieve a higher accuracy on REASONING<sub>TIMES</sub>.

## D. Visualization

We show the visualization of the transportation plan of word patch alignment on times classification as Fig.7 in the main body. For Times-relevant questions, the attended patches seem less specific. Generally, visual tokens in the background instead of foreground objects have seemingly dominant contributions.

## E. Prompts used for generative VLMs on REASONING<sub>TIMES</sub>

We also list all the prompts used for OpenFlamingo and LLaMA-Adapter V2 used for REASONING<sub>TIMES</sub> in Fig. 5 as in the paper for references.

## F. Rationale examples for Chain-of-Thought

We annotate a subset of images with rationale in REASONING tasks for OpenFlamingo Chain-of-Thought. Here, we showcase some examples of images and the rationale associated. We attempt to include visual details that are relevant for reasoning about times and locations for humans.

## G. Case study

### G.1. Failure on reasoning regions

We observe that generative VLMs perform worse in reasoning regions than reasoning countries, which is against intuition. We conduct a qualitative case study on the failure cases as in Fig. 8. It is shown that generative VLMs actually cannot really ground the reasoning process, especially in two-step reasoning. Even if the model gives correct reasoning that implies the country, it still fails to correlate to the corresponding countries. This again shows us the performance of models contained by the language models.

### G.2. Dataset bias

We compare the model prediction of original images and transfer the images into three common image styles: low

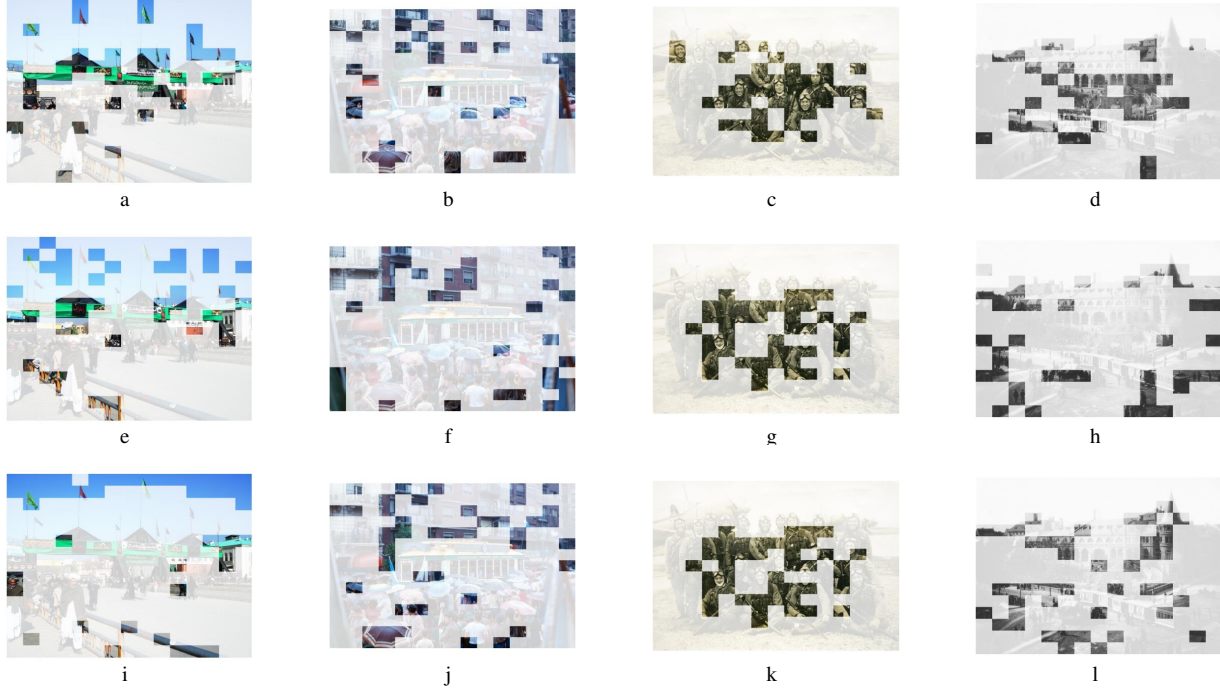

Figure 4. Visualization of transportation plan of word patch alignment on times classification. Best viewed zoomed in. Rows from top to bottom: ViLT, CLIP, and BLIP. Columns from left to right: Afghanistan(Middle East) in 2000, Argentina(Latin America) in 1980, Japan(Eastern Asia) in 1940, and Germany(Europe) in 1880.

**OpenFlamingo Cloze Test**  
 <image> *Output:* This is a historical photo taken in the 19th Century.  
 <endofchunk>  
**Open Flamingo VQA**  
 We divide time into 4 eras. These 4 eras are in the 19th Century, between 1900 and 1950, between 1950 and 2000, in the 21st Century.  
 <image> *Question:* When was this photo taken?  
*Short answer:* in the 21st Century <endofchunk>  
**OpenFlamingo VQA - CoT**  
 We divide time into 4 eras. These 4 eras are in the 19th Century, between 1900 and 1950, between 1950 and 2000, in the 21st Century.  
 <image> *Question:* When was this photo taken?  
*Answer:* Because the people in this photograph are dressed in attire typical of the Qing Dynasty in China. Therefore, it can be inferred that this photograph was taken during the Qing Dynasty, this photo was taken in the 19th Century.<endofchunk>

a

**LLaMA-Adapter V2 Instruction<sup>a</sup>**  
*Instruction:* This photograph was taken during one of the following 4 periods. We divide these 4 periods as in the 19th Century, between 1900 and 1950, between 1950 and 2000, in the 21st Century. In which period was this photo taken?  
**LLaMA-Adapter V2 Instruction<sup>b</sup>**  
*Instruction:* In which period was this photo taken?

b

Figure 5. We list respectively the prompt templates we used in OpenFlamingo for each protocol for REASONING for times in (a), instructions for LLaMA-Adapter V2 for times in (b).

quality, grayscale, and sketch. We select several example photos and show how generative VLMs fail in these cases. We find predictions of generative VLMs are not really grounded by visual cues of images. Answers depend

**OpenFlamingo Cloze Test**  
 <image> *Output:* This is a local photo taken in area Latin America.  
 <endofchunk>  
**Open Flamingo VQA**  
 The photograph was taken in one of the following eight areas. These eight areas are "Central Asia," "Southern Asia," "Latin America," "Northern America, Europe and Oceania," "Middle East," "Eastern Asia," "South-Eastern Asia," "Sub-Saharan Africa."  
 <image> *Question:* In which area was this photograph taken?  
*Short answer:* Southern Asia <endofchunk>  
**OpenFlamingo VQA - CoT**  
 The photograph was taken in one of the following eight areas. These 8 areas are "Central Asia," "Southern Asia," "Latin America," "Northern America, Europe and Oceania," "Middle East," "Eastern Asia," "South-Eastern Asia," "Sub-Saharan Africa."  
 <image> *Question:* In which area was this photograph taken?  
*Answer:* Because in the photo, there is a man wearing a turban, and the photo includes a mosque, this photo was taken in the Middle East. <endofchunk>

a

**LLaMA-Adapter V2 Instruction<sup>a</sup>**  
*Instruction:* The photograph was taken in one of the following eight regions. These eight regions are "Latin America," "Northern America, Europe and Oceania," ... "Eastern Asia," "South-Eastern Asia," "And Sub-Saharan Africa."  
**LLaMA-Adapter V2 Instruction<sup>b</sup>**  
*Instruction:* In which geopolitical region was this photo taken?

b

Figure 6. We list the prompt templates we used in location reasoning for OpenFlamingo in (a) and for LLaMA-Adapter V2 in (b).

on contexts, such as in-context demonstrations and instructions, and expose the hallucination problem [1]. Therefore, image details and style biases cannot help or influence the model reason.

| Image                                                                             | Location                    | Time | Image                                                                             | Location                                           | Time |
|-----------------------------------------------------------------------------------|-----------------------------|------|-----------------------------------------------------------------------------------|----------------------------------------------------|------|
|  | Eastern Asia<br>South Korea | 1940 |  | Southern Asia<br>India                             | 2000 |
|  | Eastern Asia<br>China       | 1880 |  | Middle East<br>Afghanistan                         | 1970 |
|  | Central Asia<br>Kazakhstan  | 2000 |  | Northern America,<br>Europe and Oceania<br>Germany | 1980 |

Figure 7. Rationale examples we used as few shot samples in protocol OpenFlamingo VQA with CoT.

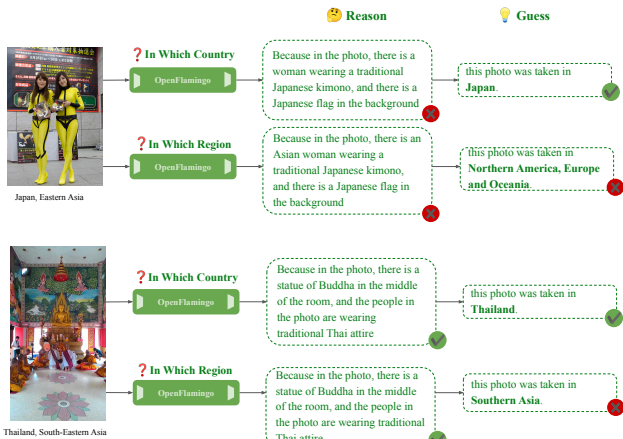

Figure 8. In some cases, the model can correctly predict the country level but fails in the region reasoning. We speculate that the visual cues could not be mapped exactly to the region definitions in our experiments.

## References

[1] Ziwei Ji, Nayeon Lee, Rita Frieske, Tiezheng Yu, Dan Su, Yan Xu, Etsuko Ishii, Ye Jin Bang, Andrea Madotto, and Pascale Fung. Survey of hallucination in natural language generation. *ACM Computing Surveys*, 55(12):1–38, 2023. 3

[2] Junnan Li, Dongxu Li, Caiming Xiong, and Steven Hoi. Blip: Bootstrapping language-image pre-training for unified vision-language understanding and generation. In *International Conference on Machine Learning*, pages 12888–12900. PMLR, 2022. 2

[3] Tsung-Yi Lin, Michael Maire, Serge Belongie, James Hays, Pietro Perona, Deva Ramanan, Piotr Dollár, and C Lawrence Zitnick. Microsoft coco: Common objects in context. In *Com-*

Original
Low Quality
Grey
Sketch

**OpenFlamingo-VQA CoT**



Because this photo is in color, and the people in the photo are wearing modern clothing, so it is not a historical photo, this photo was taken in the 21st Century.



Because this is a black and white photograph, and it features a vintage car, this photo was taken between 1900 and 1950.



Because this is a black and white photograph, and it features a vintage car, this photo was taken between 1900 and 1950.



Because this is a black and white photograph, and it features a vintage car, this photo was taken between 1900 and 1950.



Because this is a black and white photograph, and it features a vintage car, this photo was taken between 1900 and 1950.



Because this is a black and white photograph, and it features a vintage car, this photo was taken between 1900 and 1950.



Because this is a black and white photograph, and it features a vintage car, this photo was taken between 1900 and 1950.



Because this is a black and white photograph, and it features a vintage car, this photo was taken between 1900 and 1950.



Because this photo is in color. Therefore, while it is not a historical photo, this photo was taken in the 21st Century.



Because this photo is in color. Therefore, while it is not a historical photo, this photo was taken in the 21st Century.



Because this photo is in color, and the people in the photo are wearing modern clothing, so it is not a historical photo, this photo was taken in the 21st Century.



Because this photo is in color, and the people in the photo are wearing modern clothing, so it is not a historical photo, this photo was taken in the 21st Century.

**LLaMA-Adapter V2-Instruction  $\alpha$**



This photograph was taken during the 21st Century.



This photograph was taken during the 21st Century.



This photograph was taken during the 21st Century.



This photograph was taken during the 19th Century, as the men are dressed in traditional clothing and carrying umbrellas, which were popular during that time.

Figure 9. Case study of generative VLMs under different image biases. We compare the model prediction of original images and transfer the images into three common image styles that prevail in the dataset: low quality, grayscale, and sketch. The factual generation is marked in green, and the wrong generation is in red.
